# Supplementary material
Source: MDPI journal article supplement (https://www.mdpi.com/2673-4362/5/2/11)
Supplement: s1 [file s1]

Archive with 1 entries (1 files):
- jne-2918056-supplementary.pdf
